# Supplementary material for: Supramolecular assembly of dipeptide functionalized benzo[ghi]perylene monoimide directs white light emission via donor–acceptor interactions
Source: Royal Society of Chemistry journal article supplement (doi:10.1039/c5ra11804b), 2015-01-01
Supplement: c5ra11804b1.pdf [file c5ra11804b1.pdf]

Supporting Information

**Supramolecular Assembly of Dipeptide Functionalized Benzo[ghi]perylene  
Monoimide Directs White Light Emission via Donor-Acceptor Interactions**

*Manoj K. Manna,<sup>†</sup> Dnyaneshwar B. Rasale,<sup>†</sup> and Apurba K. Das<sup>\*†</sup>*

<sup>†</sup>Department of Chemistry, Indian Institute of Technology Indore, Indore 452017, India

\*To whom correspondence should be made

Dr. Apurba K. Das  
Email: [apurba.das@iiti.ac.in](mailto:apurba.das@iiti.ac.in)

## 1. Synthetic Scheme

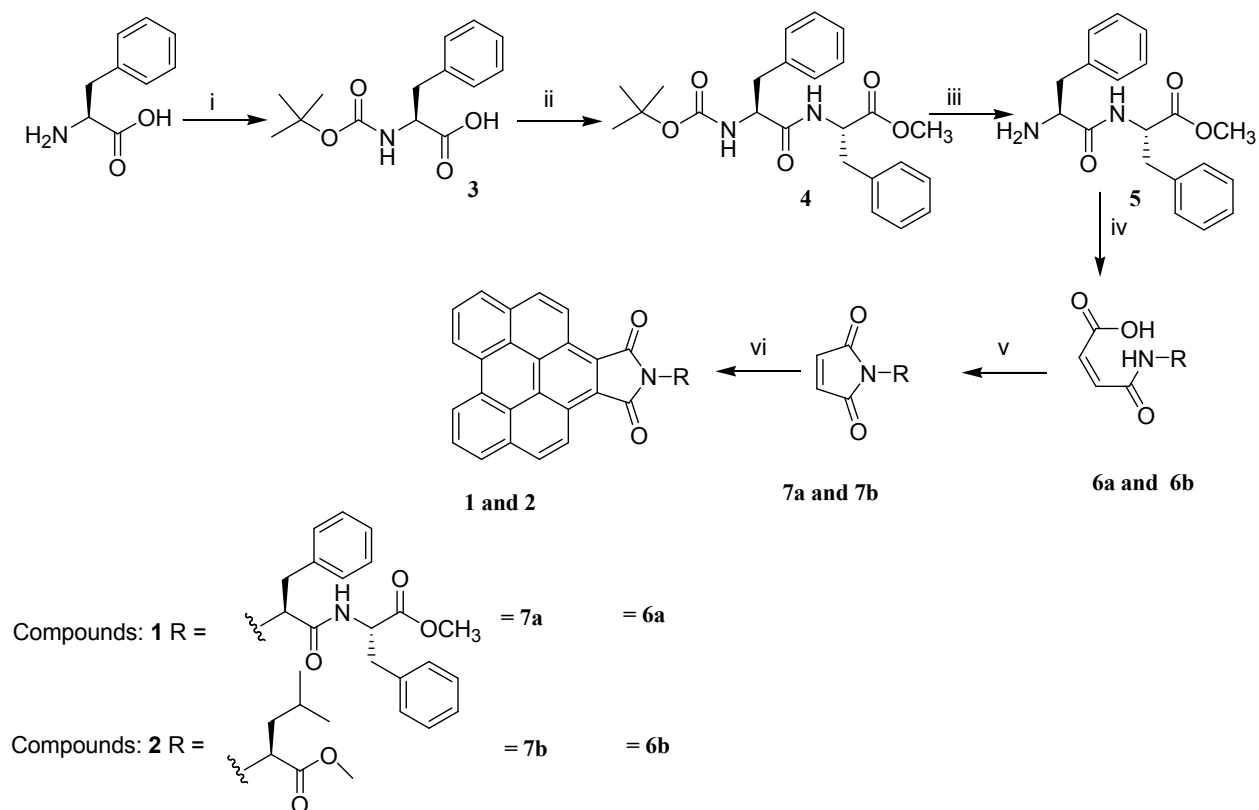

**Scheme S1.** Synthesis of *N*-dipeptide functionalized benzo[*ghi*]perylene-1,2-dicarboxylic monoimide. (i) Boc-anhydride, 1,4 dioxane, Na<sub>2</sub>CO<sub>3</sub>; (ii) phenylalanine methyl ester, HOBT/DIPC, DMF; (iii) TFA; (iv) maleic anhydride, EtOAc; (v) ZnCl<sub>2</sub>/HMDS, benzene, 80 °C; (vi) perylene, *p*-chloranil, 240 °C, 3h.

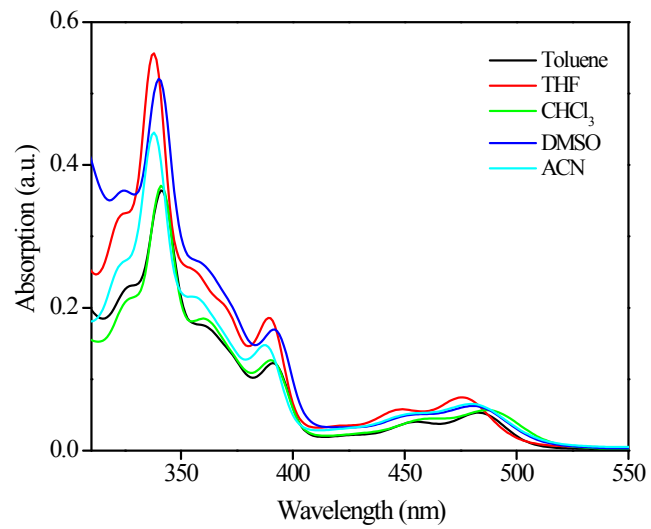

**Figure S1.** UV-Visible spectra of BPI-FF-OMe in different solvents listed from Table 1.

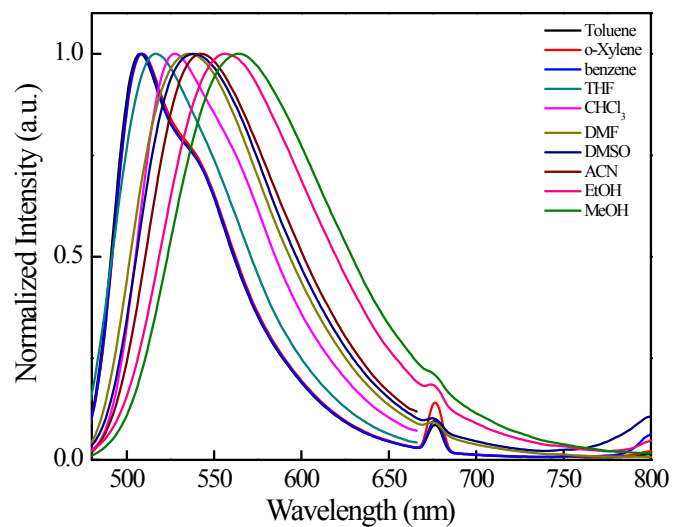

**Figure S2:** Normalized fluorescence spectra of BPI-FF-OMe in various nonpolar to polar solvents listed in Table 1.

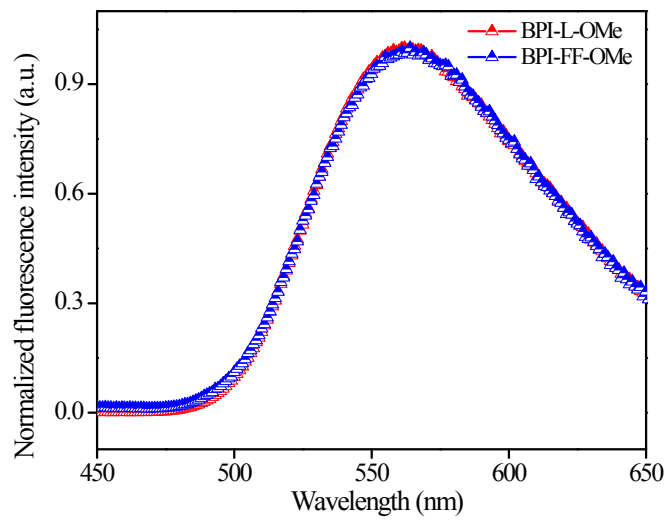

**Figure S3:** Normalized fluorescence spectra of BPI-FF-OMe and BPI-L-OMe in methanol.

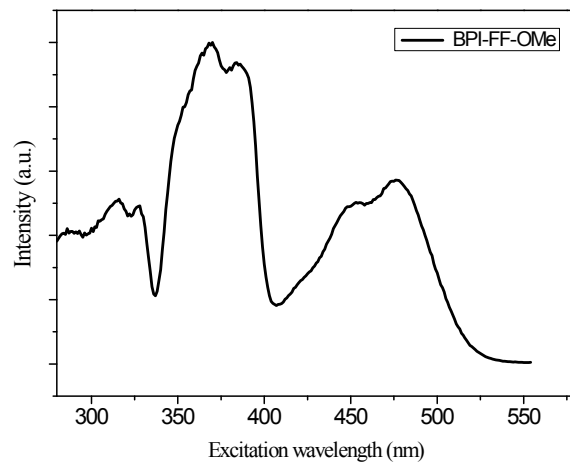

**Figure S4.** Fluorescence excitation spectra of donor BPI-FF-OMe in methanol (emission wavelength 564 nm).

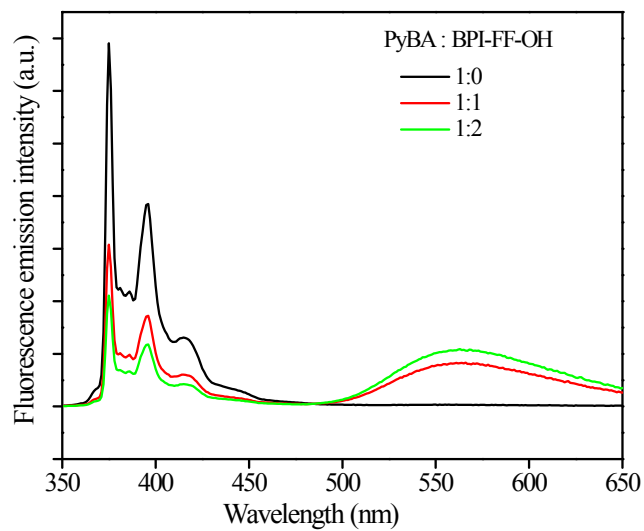

**Figure S5:** Fluorescence spectra of BPI-FF-OMe with equimolar mixture of PyBA cover various emission wavelength for white light emission.

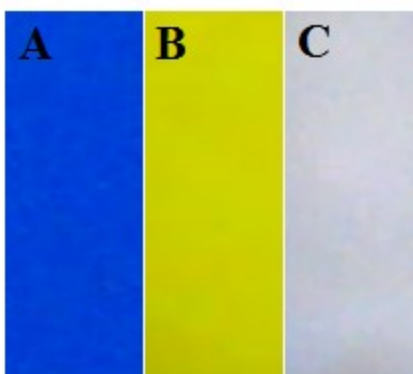

**Figure S6.** Optical images show solid state (thin film) blue, yellow and white emission when solution of PyBA, BPI-FF-OMe and mixture (10:1) of PyBA and BPI-FF-OMe coated over silica plate and subsequent illumination under UV lamp at 365 nm.



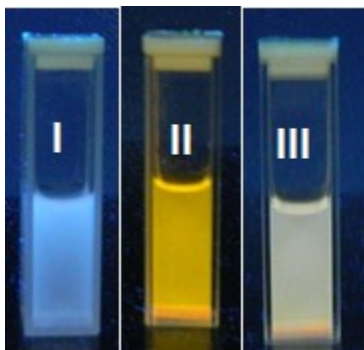

**Figure S7.** Optical images show blue, yellow and white emission of solution of PyBA, BPI-L-OMe and mixture (10:1) of PyBA and BPI-L-OMe upon illumination under UV lamp at 365 nm.

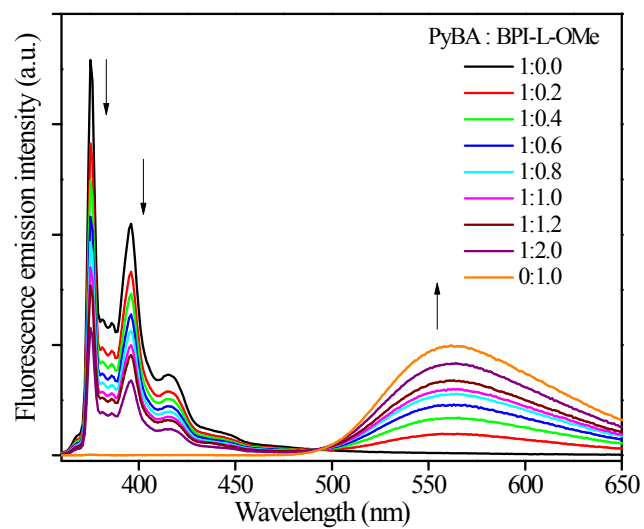

**Figure S8.** A) Fluorescence spectra of ( $1 \times 10^{-6}$  mol L $^{-1}$ ) of PyBA, BPI-L-OMe and mixture of different equivalents of PyBA and BPI-L-OMe in methanol.

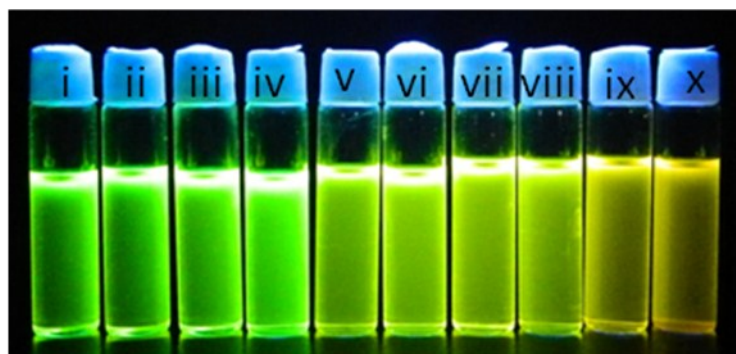

**Figure S9.** Optical images of BPI-FF-OMe in different solvents listed in Table 1 upon illumination under UV lamp at 365 nm.

**Table S1:** Reports on the white light emitting materials.

|   | Molecular structure                                                                 | Purpose              | Reference                                                     |
|---|-------------------------------------------------------------------------------------|----------------------|---------------------------------------------------------------|
| 1 | 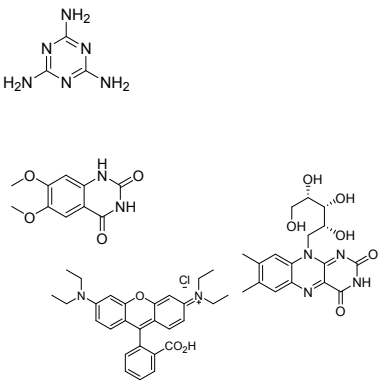   | White light emission | <i>ACS Appl. Mater. Interfaces</i> 2013, <b>5</b> , 5478–5485 |
| 2 |   | White light emission | <i>Adv. Mater.</i> 2009, <b>21</b> , 2059–2063.               |
| 3 |  | White light emission | <i>Chem. Commun.</i> , 2013, <b>49</b> , 6909-6911.           |
| 4 |  | White light emission | <i>Chem. Eur. J.</i> 2012, <b>18</b> , 1290-1294.             |
| 5 |  | White light emission | <i>Chem. Commun.</i> , 2010, <b>46</b> , 8002–8004.           |
| 6 |  | White light emission | <i>Adv. Mater.</i> 2008, <b>20</b> , 79-83                    |

|    |                                                                                     |                      |                                                          |
|----|-------------------------------------------------------------------------------------|----------------------|----------------------------------------------------------|
| 7  | 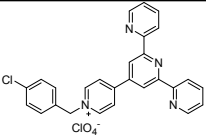   | White light emission | <i>Chem. Commun.</i> , 2014, <b>50</b> , 15878-15881     |
| 8  |    | White light emission | <i>J. Phys. Chem. C</i> 2012, <b>116</b> , 21706-21716   |
| 9  |    | White light emission | <i>Adv. Mater.</i> , 2005, <b>17</b> , 34-39             |
| 10 |   | White light emission | <i>J. Am. Chem. Soc.</i> 2009, <b>131</b> , 14043-14049. |
| 11 |  | White light emission | <i>International Journal of Photoenergy</i> , 2014       |
| 12 |  | White light emission | <i>J. Am. Chem. Soc.</i> 2006, <b>128</b> , 14081-14092, |

|    |                                                                                                                                   |                      |                                                         |
|----|-----------------------------------------------------------------------------------------------------------------------------------|----------------------|---------------------------------------------------------|
| 13 | 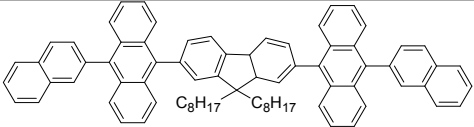                                                 | White light emission | <i>J. Mater. Chem.</i> , 2011, <b>21</b> , 12969-12976. |
| 14 |                                                  | White light emission | <i>J. Phys. Chem. C</i> 2011, <b>115</b> , 17965-17972  |
| 15 |                                                  | White light emission | <i>J. Am. Chem. Soc.</i> 2011, <b>133</b> , 17738-17745 |
| 16 |                                                 | White light emission | <i>Adv. Mater.</i> 2007, <b>19</b> , 3672-3676          |
| 17 |  <p><math>D_1(n = 4, 8, 12, 14, 20)</math></p> | White light emission | <i>Angew. chem.</i> 2014, <b>126</b> , 4660-4665.       |
| 18 |                                                | White light emission | <i>Chem. Eur. J.</i> 2009, <b>15</b> , 9737- 9746.      |

|    |                                                                                                                                                                                                                      |                      |                                                        |
|----|----------------------------------------------------------------------------------------------------------------------------------------------------------------------------------------------------------------------|----------------------|--------------------------------------------------------|
| 19 | 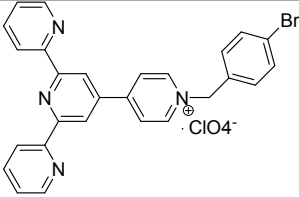                                                                                                                                    | White light emission | <i>J. Mater. Chem. C</i> , 2015, <b>3</b> , 4563-4569. |
| 20 |                                                                                                                                     | White light emission | <i>J. Phys. Chem. C</i> 2009, <b>113</b> , 4641-4647   |
| 21 | Vegetable extract                                                                                                                                                                                                    | White light emission | <i>Scientific Reports</i> , 2015, <b>5</b> , 11118.    |
| 23 |                                                                                                                                    | White light emission | <i>J. Am. Chem. Soc.</i> 2006, <b>128</b> , 5592-5593  |
| 24 |  <p>n = 2, 3, 6: BCz 1, 2, 3</p>  <p>PBI-4</p> | White light emission | <i>Chem. Commun.</i> , 2013, <b>49</b> , 8178-8180.    |
| 25 |                                                                                                                                   | White light emission | <i>Chem. Commun.</i> , 2015, <b>51</b> , 2130-2133     |

|    |                                                                                                                       |                      |                                                                 |
|----|-----------------------------------------------------------------------------------------------------------------------|----------------------|-----------------------------------------------------------------|
| 26 | 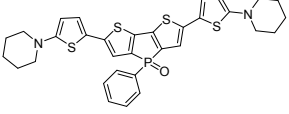                                     | White light emission | <i>Chem. Commun.</i> , 2013, <b>49</b> , 4899-4901              |
| 27 |  <p>POP-PU</p>                       | White light emission | <i>ACS Appl. Mater. Interfaces</i> 2014, <b>6</b> , 22569–22576 |
| 28 |                                     | White light emission | <i>J. Am. Chem. Soc.</i> 2009, <b>131</b> , 833-843.            |
| 29 |  <p>DP</p> <p>DCM</p> <p>NC CN</p> | White light emission | <i>J. Am. Chem. Soc.</i> 2010, <b>132</b> , 1742–1743           |



|    |                                                                                     |                      |                                                       |
|----|-------------------------------------------------------------------------------------|----------------------|-------------------------------------------------------|
| 30 | 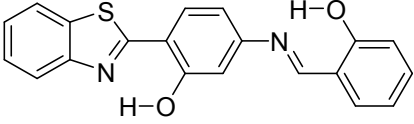   | White light emission | <i>Phys. Chem. A</i> 2009, <b>113</b> , 5888–5895     |
| 31 |   | White light emission | <i>Adv. Mater.</i> 2013, <b>25</b> , 1713–1718        |
| 32 |  | White light emission | <i>J. Mater. Chem. C</i> , 2013, <b>1</b> , 4437–4444 |

|    |                                                                                     |                      |                                                                     |
|----|-------------------------------------------------------------------------------------|----------------------|---------------------------------------------------------------------|
|    | 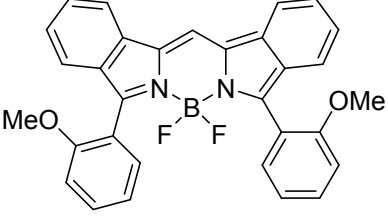   |                      |                                                                     |
| 33 |   | White light emission | <p><i>Angew. Chem. Int. Ed.</i><br/>2012, <b>51</b>, 3391 –3395</p> |
| 34 |  | White light emission | <p><i>Angew. Chem. Int. Ed.</i><br/>2011, <b>50</b>, 7032 –7036</p> |

**Table S2.** DLS characterization of BPI-FF-OH nanospheres in toluene and methanol

| # | Solvent  | $d_h/\text{nm}^a$ | PDI <sup>b</sup> | $\xi/\text{mV}^c$ |
|---|----------|-------------------|------------------|-------------------|
| 1 | Methanol | 613               | 0.30             | -17.97            |
| 2 | Toluene  | 857               | 0.47             | -25.89            |

<sup>a</sup> $d_h$  is the hydrodynamic diameter. <sup>b</sup>PDI is the polydispersity index. <sup>c</sup> $\xi$  is the zeta potential.

### The Lippert-Mataga Equation

Equation 3 is a simplified from equation 2.

$$\bar{\nu}_{abs} - \bar{\nu}_{em} = \frac{2}{hc} \left( \frac{\varepsilon - 1}{2\varepsilon + 1} - \frac{n^2 - 1}{2n^2 + 1} \right) \frac{(\mu_e - \mu_g)^2}{\rho^3} + C \quad (2)$$

$$\Delta\bar{\nu} = \frac{2\Delta f}{4\pi\varepsilon_0 hc\rho^3} (\mu_e - \mu_g)^2 + C \quad (3)$$

$\Delta\bar{\nu} = \bar{\nu}_{abs} - \bar{\nu}_{em}$  is the solvatochromic shift or Stokes shift (in  $\text{cm}^{-1}$ ) between the absorbance and emission maxima [ $\bar{\nu}_{abs} = 1/\lambda_{abs}(max)$ ,  $\bar{\nu}_{em} = 1/\lambda_{em}(max)$ ].  $\Delta f = [(\varepsilon - 1/2\varepsilon + 1) - (n^2 - 1/2n^2 + 1)]$  is solvent polarizability parameter, which is described by solvent's dielectric constants( $\varepsilon$ ) and refractive indices( $n$ ).  $\rho$  represents radius of solvated cavity of dipole.  $\mu_e$  and  $\mu_g$  are the dipole moments of a dye both in excited and ground states respectively. The Lippert - Mataga expression of Stokes shift strongly depends on the change of dipole moment of a dye upon excitation ( $\Delta\mu_{ge} = \mu_e - \mu_g$ ) and the size of the cavity radius ( $\rho$ ).  $\varepsilon_0$  denotes dielectric constant of vacuum.  $h$  and  $c$  are Plank's constant and velocity of light respectively.  $C$  is a constant.

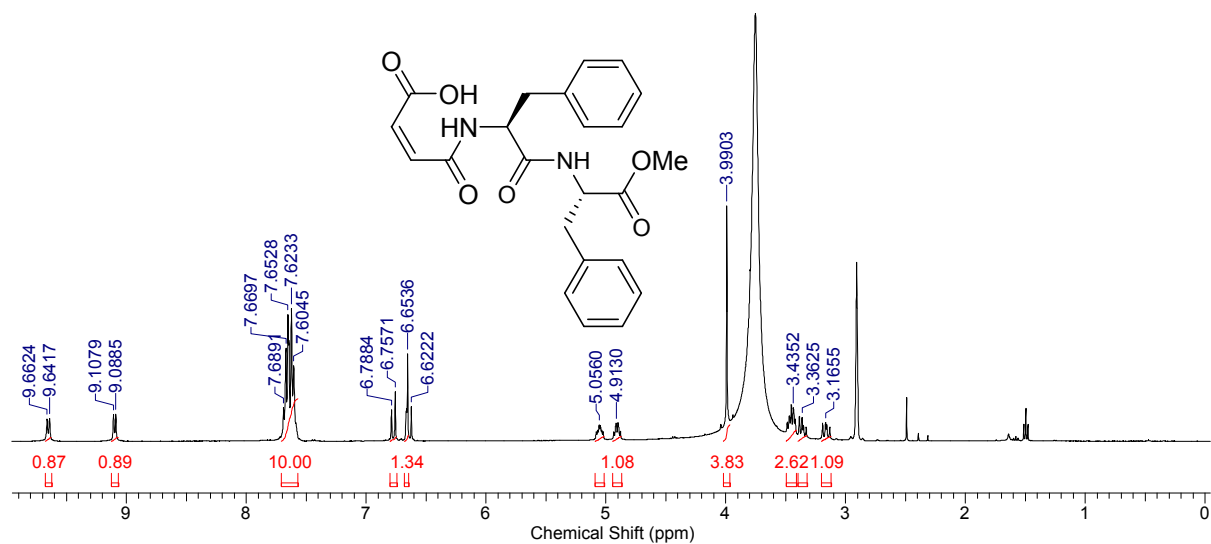

**Figure S10:** <sup>1</sup>H NMR spectrum (400 MHz, DMSO-d<sub>6</sub>) for *N*-maleyl-L-Phe(1)-L-Phe(2)-OMe **5**.

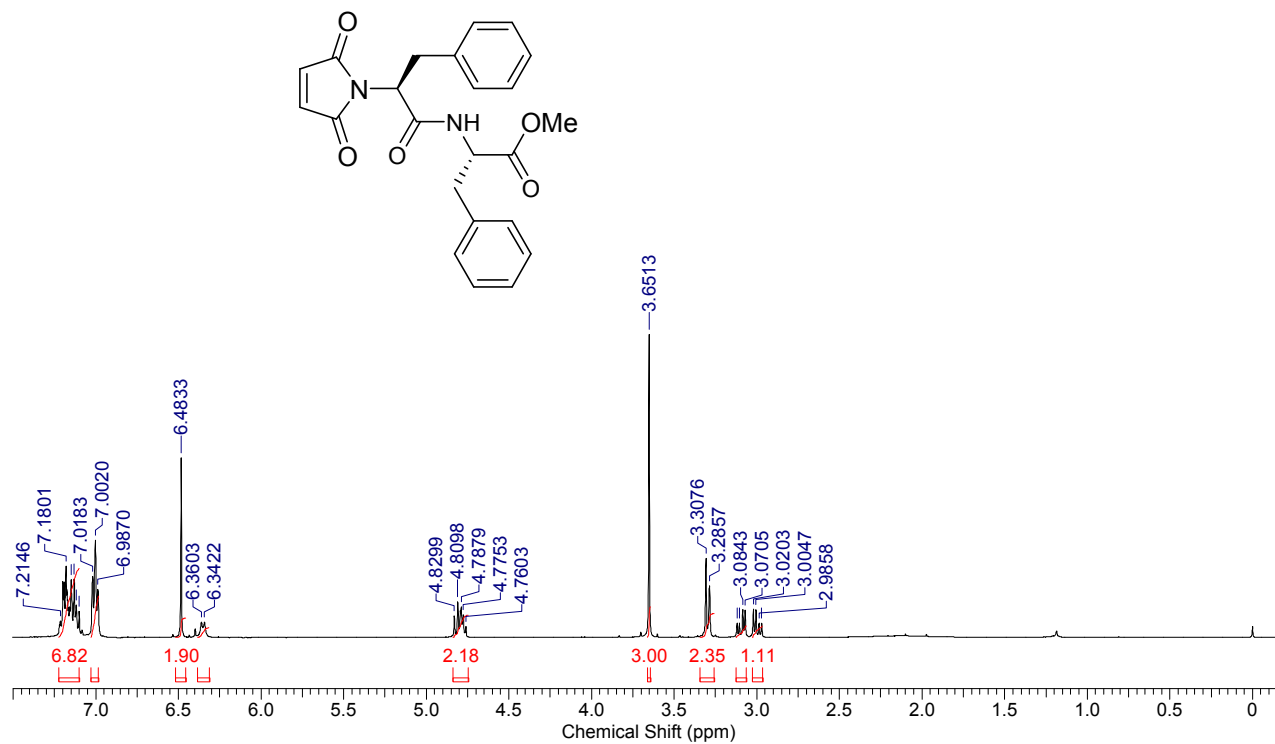

**Figure S11:** <sup>1</sup>H NMR spectrum (400 MHz, CDCl<sub>3</sub>) for *N*-maleoyl-L-Phe(1)-L-Phe(2)-OMe **6**.

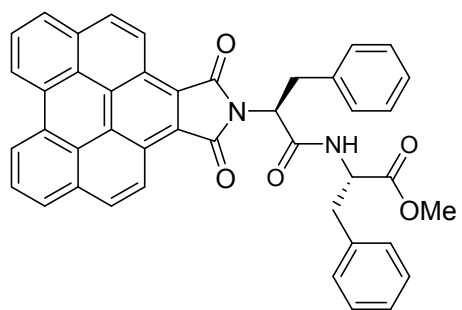

**Figure S12:**  $^1\text{H}$  NMR spectrum (400 MHz,  $\text{CDCl}_3$ ) for benzo[ghi]perylene-1,2-dicarboxylic(L-Phe-L-Phe-OMe)imide **1**.

DMSO-d6

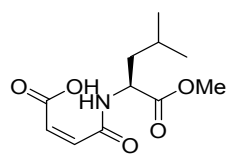

**Figure S13:**  $^1\text{H}$  NMR spectrum (400 MHz,  $\text{DMSO-d}_6$ ) for maleyl-Leu-OMe .

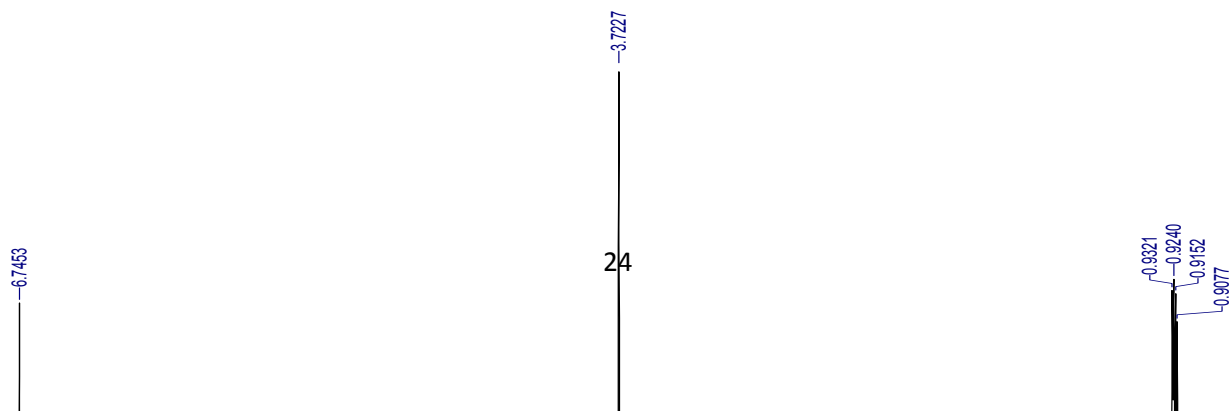



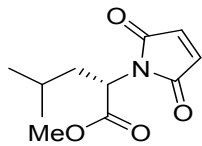

**Figure S14:**  $^1\text{H}$  NMR spectrum (400 MHz,  $\text{CDCl}_3$ ) for maleoyl-L-Leu-OMe.

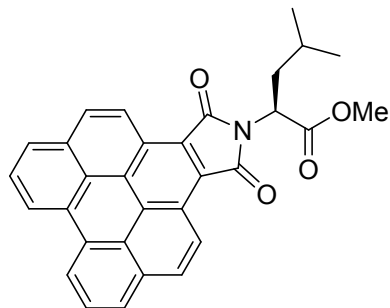

**Figure S15:**  $^1\text{H}$  NMR spectrum (400 MHz,  $\text{CDCl}_3$ ) for benzo[ghi]perylene-1,2-dicarboxylic(L-Leu-OMe)imide.

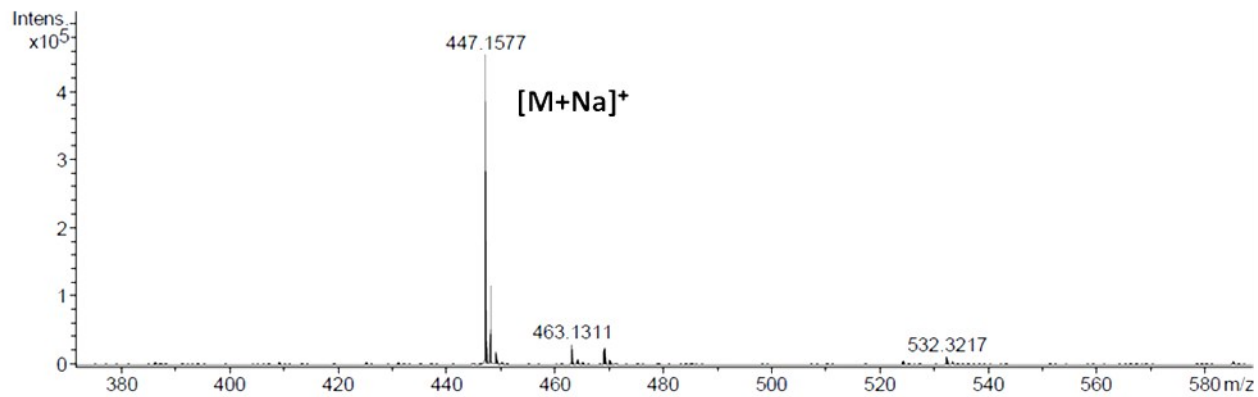

**Figure S17:** Mass spectra of *N*-maleyl-L-Phe(1)-L-Phe(2)-OMe **5**. The peak  $m/z$   $(M + Na)^+ = 447.1577$  corresponds to the synthesis of *N*-maleyl-L-Phe(1)-L-Phe(2)-OMe.

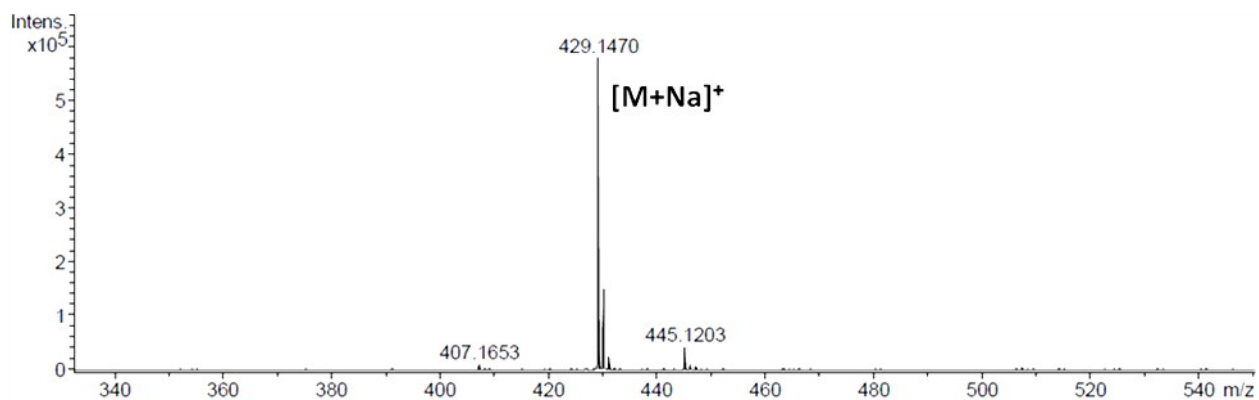

**Figure S18:** Mass spectra of *N*-maleoyl-L-Phe(1)-L-Phe(2)-OMe **6**. The peak  $m/z$   $(M + Na)^+ = 429.1470$  corresponds to the synthesis of *N*-maleoyl-L-Phe(1)-L-Phe(2)-OMe.

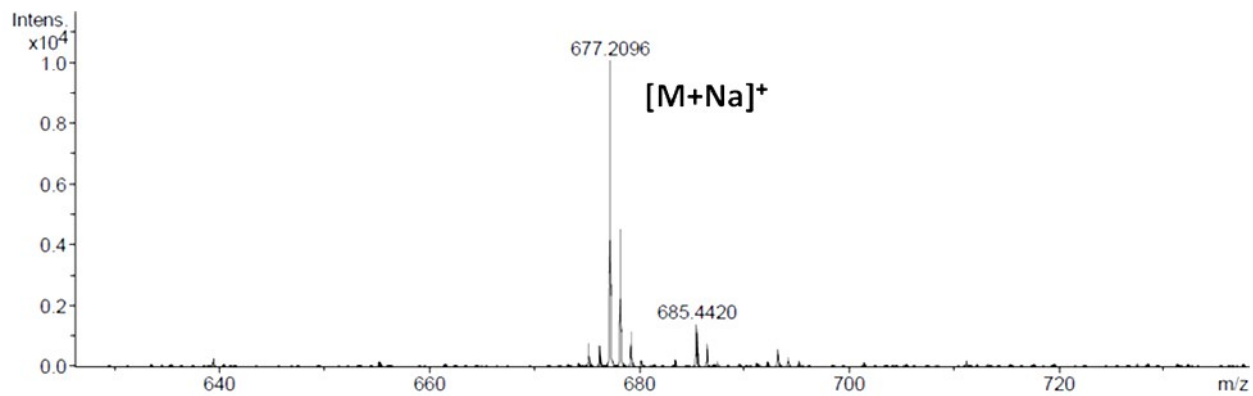

**Figure S19:** Mass spectra of benzo[ghi]perylene-1,2-dicarboxylic(L-Phe-L-Phe-OMe)imide **1**. The peak  $m/z (M + Na)^+ = 677.2096$  corresponds to the synthesis of benzo[ghi]perylene-1,2-dicarboxylic(L-Phe-L-Phe-OMe)imide.
